# Supplementary material for: TSCytoPred: a deep learning framework for inferring cytokine expression trajectories from irregular longitudinal gene expression data to enhance multi-omics analyses
Source: PeerJ journal article supplement (doi:10.7717/peerj.20270), 2025-11-10

**Supplementary Material S1.** Overall workflow of TSCytoPred from data collection to time-series cytokine expression inference.

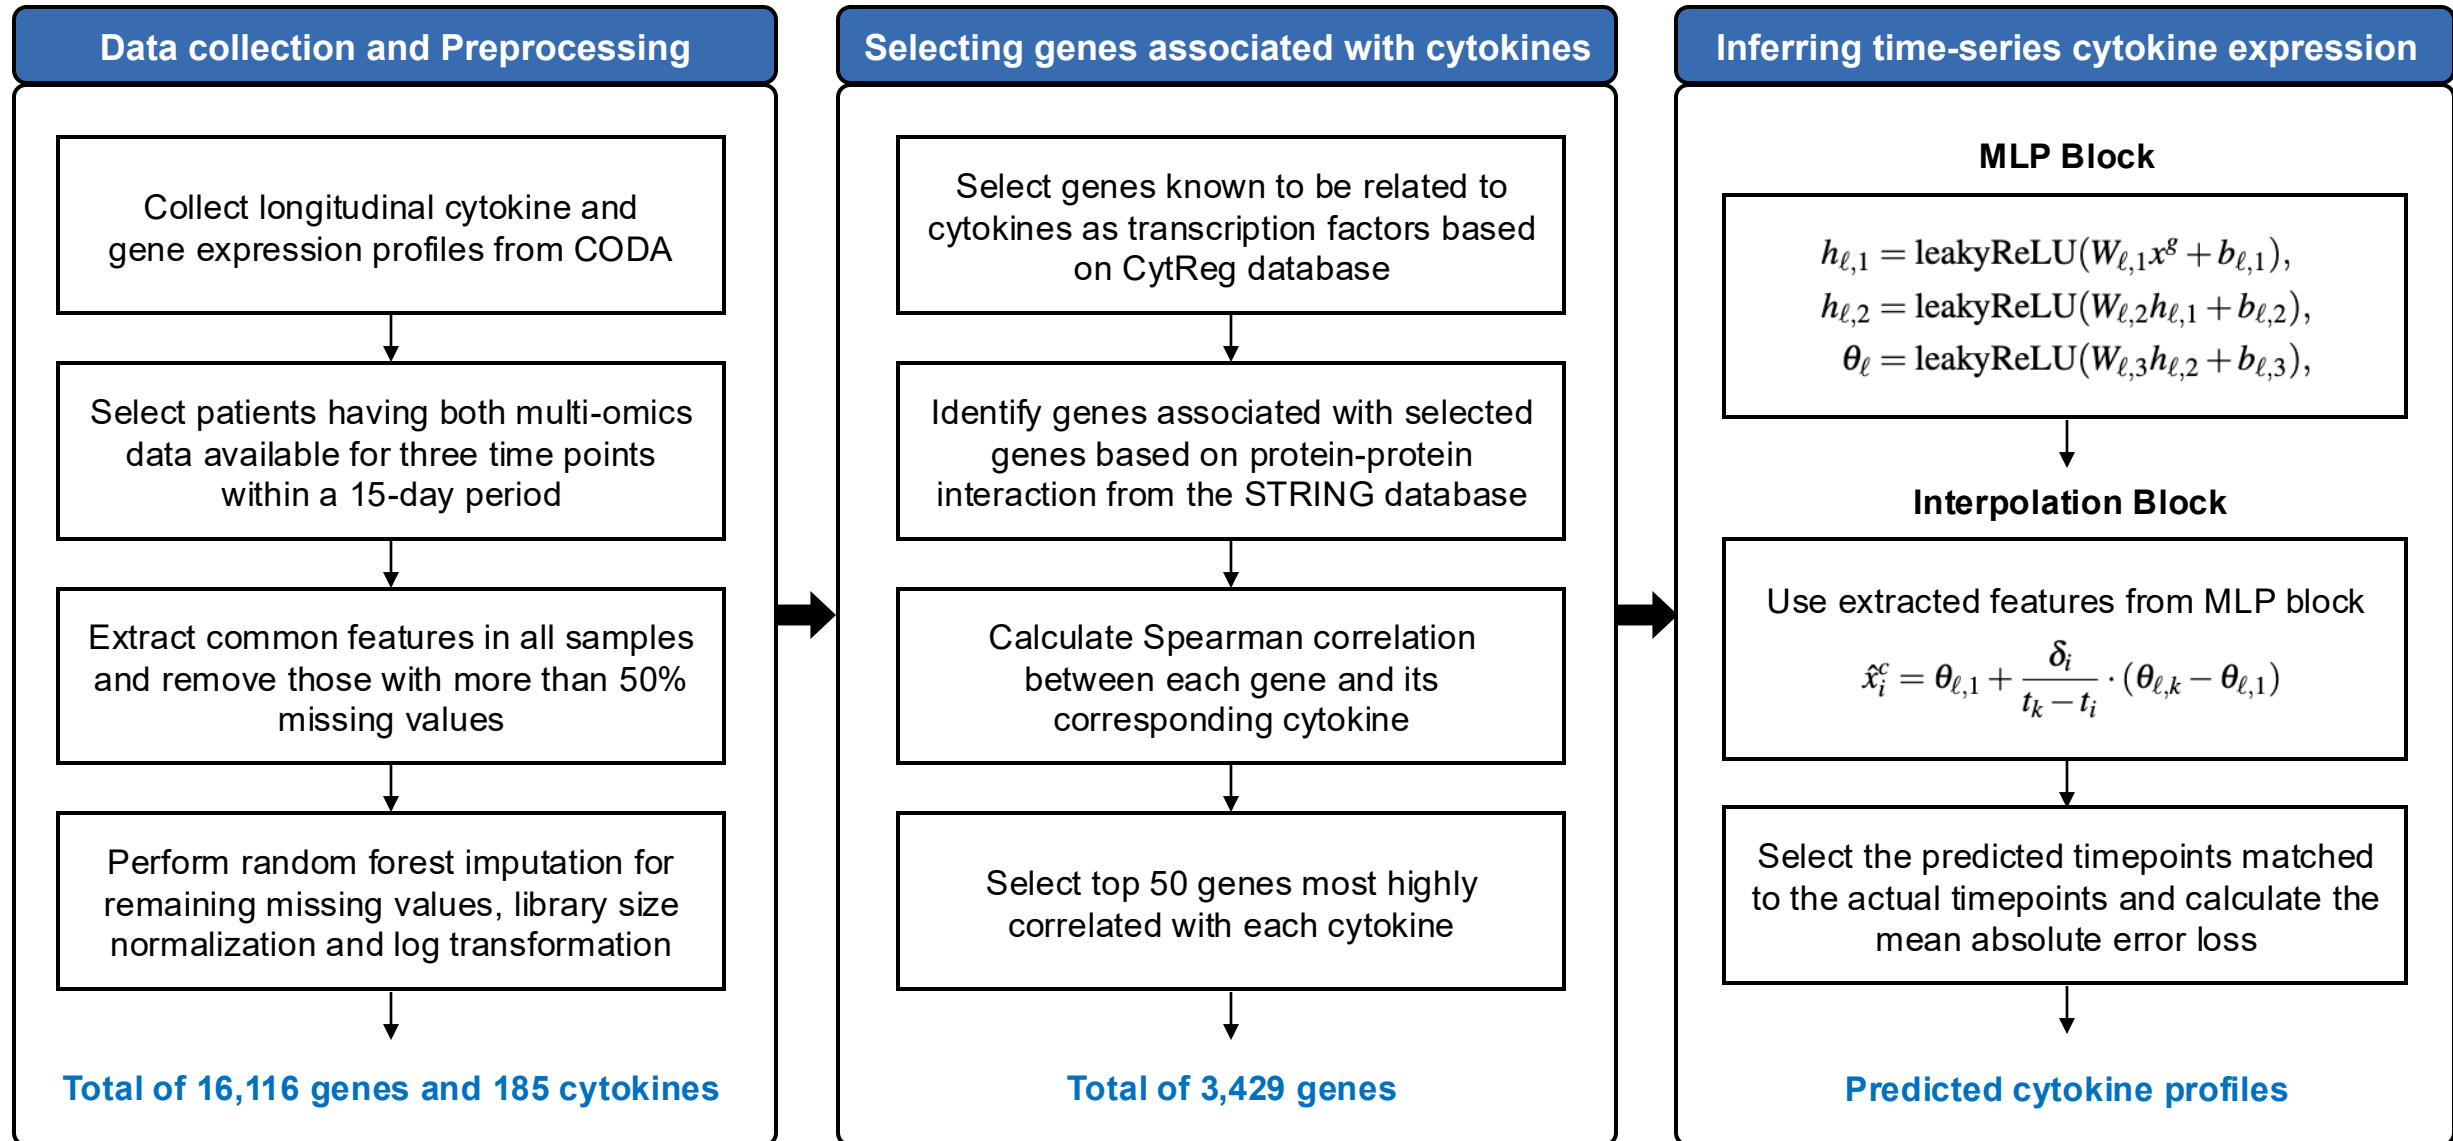

Supplement: Supplementary_Material_S1.pdf [file Supplementary_Material_S1.pdf]
