# Supplementary material for: TSCytoPred: a deep learning framework for inferring cytokine expression trajectories from irregular longitudinal gene expression data to enhance multi-omics analyses
Source: PeerJ journal article supplement (doi:10.7717/peerj.20270), 2025-11-10

**Supplementary Material S3.** Distribution of Spearman correlation coefficients across all cytokine-top 50 gene pairs in the COVID-19 dataset, with the dashed line indicating the average.

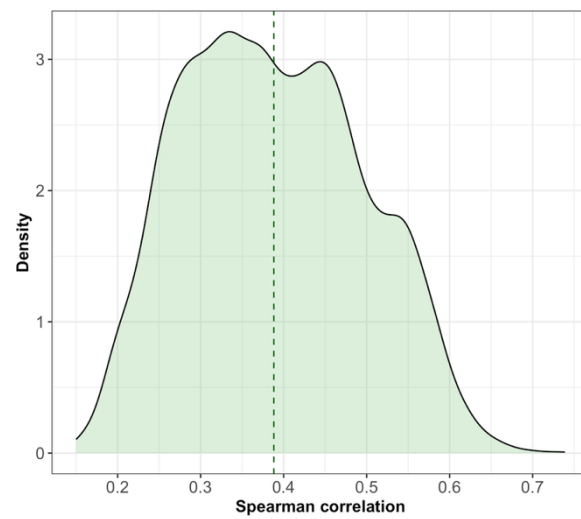

Supplement: Supplementary_Material_S3.pdf [file Supplementary_Material_S3.pdf]
