# Supplementary material for: TSCytoPred: a deep learning framework for inferring cytokine expression trajectories from irregular longitudinal gene expression data to enhance multi-omics analyses
Source: PeerJ journal article supplement (doi:10.7717/peerj.20270), 2025-11-10

**Supplementary Material S13.** Distribution of actual and inferred cytokine expression in test data for COVID-19 dataset using different time-series regression methods. (Notations: ns- not significant, \* - p-value < 0.05, \*\* - p-value < 0.01.)

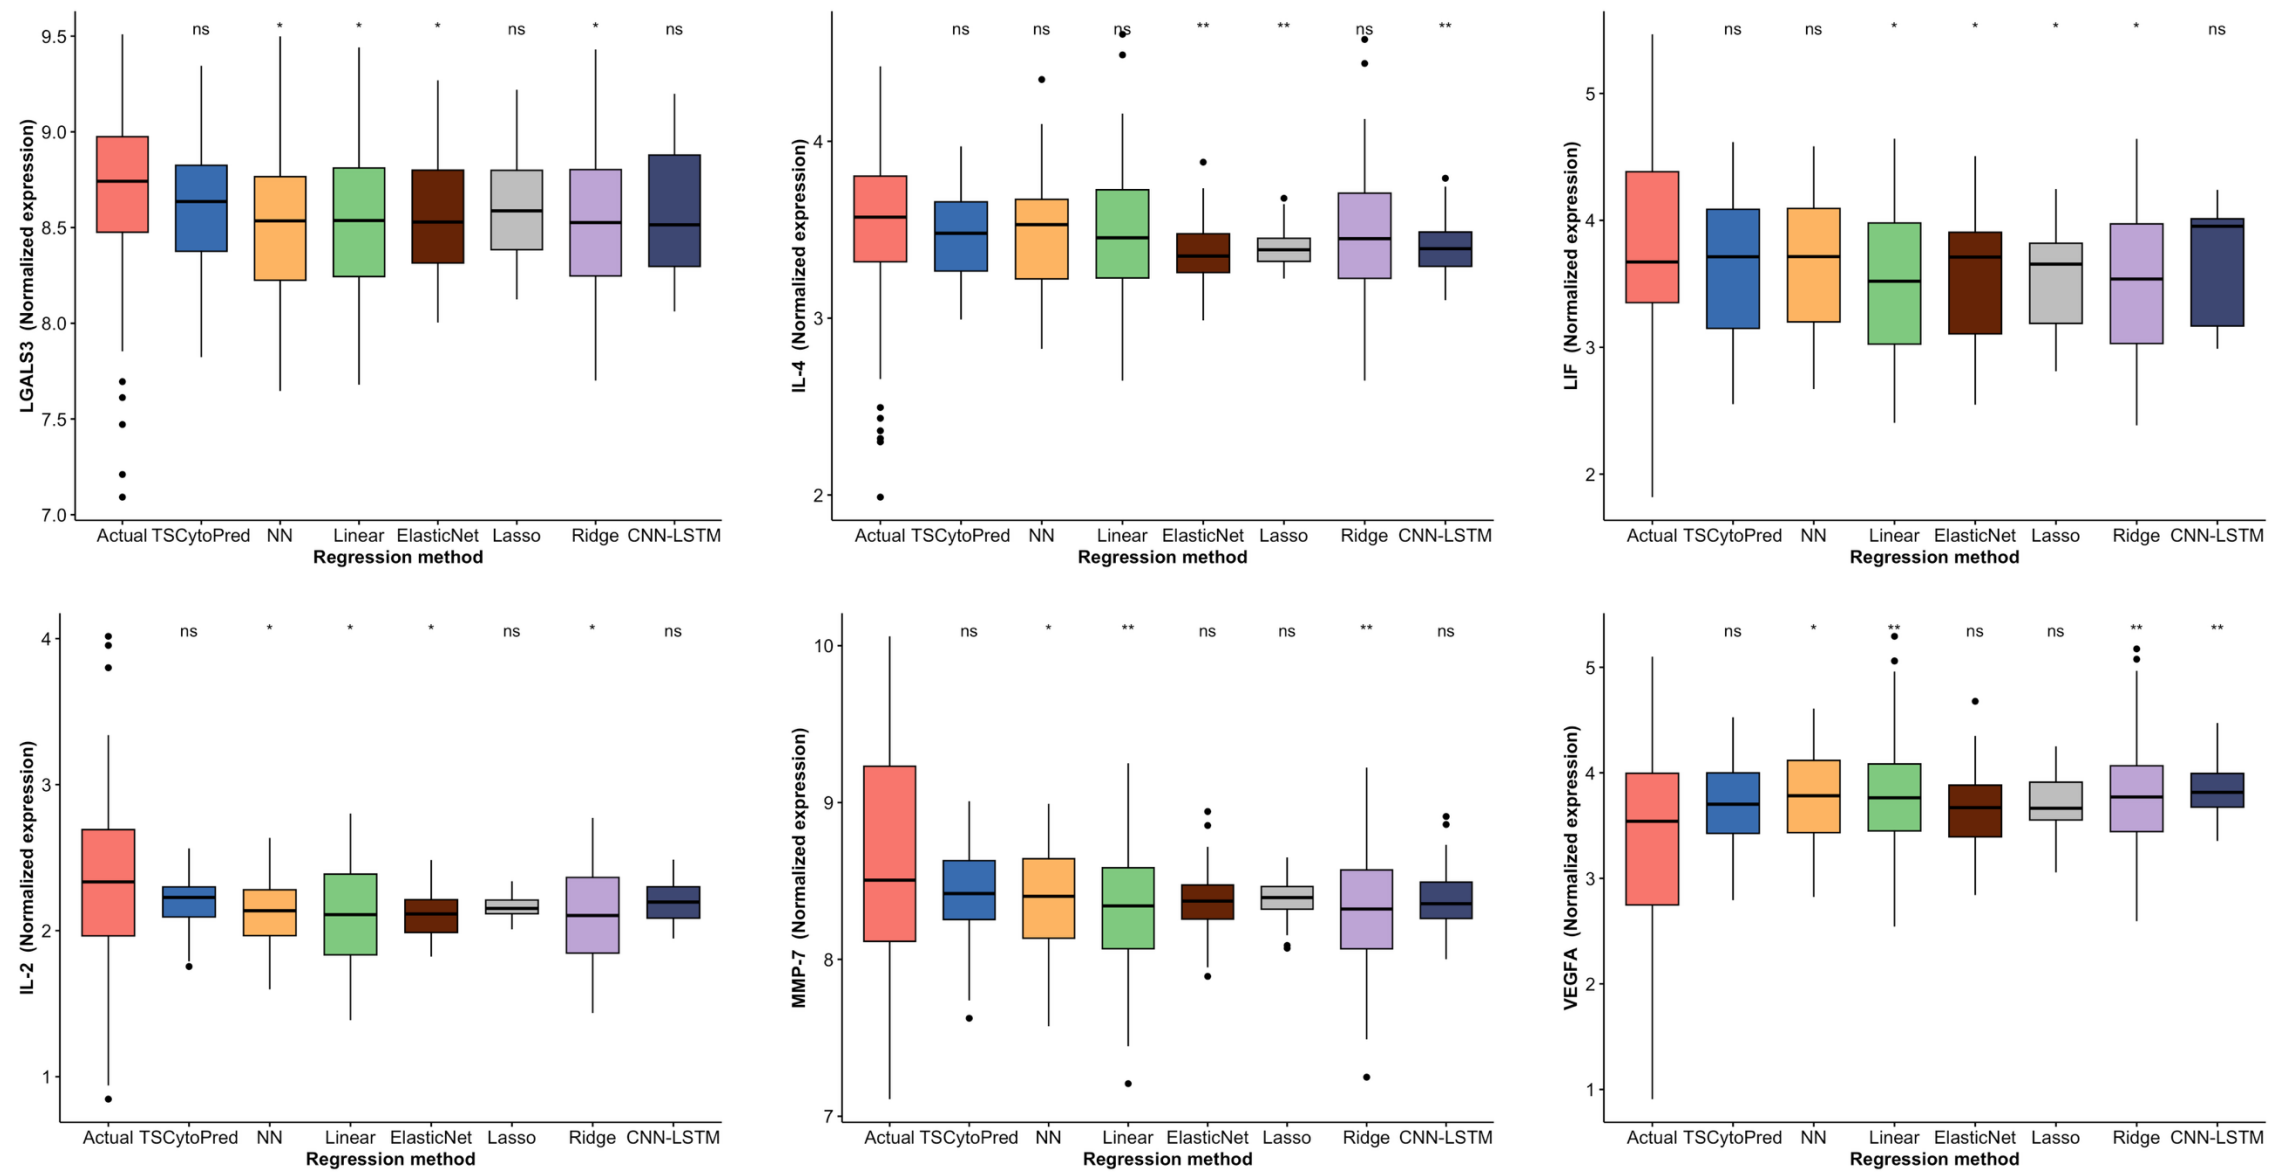

Supplement: Supplementary_Material_S13.pdf [file Supplementary_Material_S13.pdf]
