# Supplementary material for: TSCytoPred: a deep learning framework for inferring cytokine expression trajectories from irregular longitudinal gene expression data to enhance multi-omics analyses
Source: PeerJ journal article supplement (doi:10.7717/peerj.20270), 2025-11-10
Supplement: Supplementary_Material_S15.pdf [file Supplementary_Material_S15.pdf]

**Supplementary Material S15.**

Average prediction performance results of TSCytoPred with other comparison methods based on the 5-fold cross validation using COVID-19 patients with two time points.

| Testing scenario    | w/o infer         | w/ infer (TSCytoPred) | w/ infer (NN)     | w/ infer (Linear) | w/ infer (ElasticNet) | w/ infer (Lasso)  | w/ infer (Ridge)  | w/ infer (CNN-LSTM) |
|---------------------|-------------------|-----------------------|-------------------|-------------------|-----------------------|-------------------|-------------------|---------------------|
| Timepoint-level     | $0.565 \pm 0.028$ | $0.602 \pm 0.042$     | $0.570 \pm 0.051$ | $0.596 \pm 0.053$ | $0.540 \pm 0.037$     | $0.547 \pm 0.041$ | $0.562 \pm 0.072$ | $0.573 \pm 0.061$   |
| Patient-worst-level | $0.568 \pm 0.034$ | $0.592 \pm 0.115$     | $0.565 \pm 0.121$ | $0.508 \pm 0.101$ | $0.526 \pm 0.164$     | $0.550 \pm 0.126$ | $0.528 \pm 0.108$ | $0.527 \pm 0.190$   |
